# Supplementary material for: Mental Health among Spanish Adults with Diabetes: Findings from a Population-Based Case–Controlled Study
Source: MDPI journal article supplement (doi:10.3390/ijerph18116088), 2021-06-04
Supplement: s1 [file s1]

**Table S1.** Definition of variables used in our investigation according to the questions included in the Spanish National Health Interview Survey 2017.

| Questions                                                                                                                                                                                                               | Description and Answer                                                                                                                                                                                                                                                                                                                                                                                                                                           | Variables                              | Categories                                                                                                                              |
|-------------------------------------------------------------------------------------------------------------------------------------------------------------------------------------------------------------------------|------------------------------------------------------------------------------------------------------------------------------------------------------------------------------------------------------------------------------------------------------------------------------------------------------------------------------------------------------------------------------------------------------------------------------------------------------------------|----------------------------------------|-----------------------------------------------------------------------------------------------------------------------------------------|
| 12 items Global health questionnaire (GHQ-12) <sup>1,*</sup>                                                                                                                                                            | The GHQ-12 consists of 12 items, each assessing the severity of a mental problem over the last few weeks using a 4-point Likert-type scale (from 0 to 3). Positive items were corrected from 0 (always) to 3 (never), and negative ones from 3 (always) to 0 (never). Scores on the GHQ-12 are obtained from a summation of responses to the 12 questions, with the first two response options scoring 0 and the last two scoring 1 (0–0–1–1).                   | Psychological distress GHQ-12 > 3      | Yes: GHQ-12 > 3<br>No: GHQ-12 ≤ 3                                                                                                       |
| - Next I am going to read you a list of types of medications, please tell me which one or more of them have you taken in the last 2 weeks?<br>- Was it prescribed by the doctor?                                        | A list of 23 medications are read the person interviewed. For those medications with an affirmative answer in the first question, the second are completed consecutively for each specific medication.<br>1. Tranquilizers sedatives or “sleeping pills”,<br>2. Antidepressants                                                                                                                                                                                  | Consumption of psychiatric medications | Yes: Those who answered “yes” to both question for options 1 and/or 2<br>No: Answered “no” to one or both questions for options 1 and 2 |
| Which is your sex?                                                                                                                                                                                                      | Men<br>Women                                                                                                                                                                                                                                                                                                                                                                                                                                                     | Sex                                    | Men<br>Women                                                                                                                            |
| How old are you?                                                                                                                                                                                                        | Age in years                                                                                                                                                                                                                                                                                                                                                                                                                                                     | Age groups                             | 35–59 years<br>60–69 years<br>70–79 years<br>80 or more                                                                                 |
| Of the following, which better describes your current situation regarding who you live with?                                                                                                                            | 1. Living with my husband/wife.<br>2. Living with my couple<br>3. Not living with a couple                                                                                                                                                                                                                                                                                                                                                                       | Living with a couple                   | Yes. Options 1 and 2<br>No: Option 3                                                                                                    |
| What level of education have you completed?                                                                                                                                                                             | 1. Does not know how to read or write<br>2. Incomplete primary education<br>3. Complete primary education (<br>4. First stage of Secondary Education, with or without a qualification<br>5. Elementary Spanish Upper Secondary Education])<br>6. Upper secondary education<br>7. Intermediate vocational training or equivalent<br>8. Advanced vocational training or equivalent<br>9. University studies or equivalent<br>10. Over university (master, PhD....) | Educational level                      | Primary Options 1 to 3<br>Secondary Options 4 to 8<br>University Options 9 and 10                                                       |
| The social class categories have been taken from the proposal made by the Spanish Society of Epidemiology’s (SEE) Working Group on Determinants, in which social class is assigned according to occupation <sup>2</sup> | National Classification of Occupations 2011 (CNO2011), <sup>2</sup>                                                                                                                                                                                                                                                                                                                                                                                              | Social Class                           | Upper<br>Meddle<br>Lower                                                                                                                |

| Questions                                                                                                                                                                                                                                | Description and Answer                                                                                                                                                                                                                                                                         | Variables                                                                                                                                                                                                                                                                                                                                                                                                                                | Categories                                                                        |
|------------------------------------------------------------------------------------------------------------------------------------------------------------------------------------------------------------------------------------------|------------------------------------------------------------------------------------------------------------------------------------------------------------------------------------------------------------------------------------------------------------------------------------------------|------------------------------------------------------------------------------------------------------------------------------------------------------------------------------------------------------------------------------------------------------------------------------------------------------------------------------------------------------------------------------------------------------------------------------------------|-----------------------------------------------------------------------------------|
| In the past twelve month. How is your perception of your general health status?                                                                                                                                                          | 1. Very good<br>2. Good,<br>3. Fair<br>4. Bad<br>5. Very bad.                                                                                                                                                                                                                                  | Self-rated health                                                                                                                                                                                                                                                                                                                                                                                                                        | Very good/ good: Options 1 and 2<br>Fair/poor/very poor: Options 3 to 5           |
| In the last 12 months, have you had to use an emergency service for any problem or illness?                                                                                                                                              | 1. Yes<br>2. No                                                                                                                                                                                                                                                                                | Emergency services in last year                                                                                                                                                                                                                                                                                                                                                                                                          | 1. Yes<br>2. No                                                                   |
| In the last 12 months, have you had to be hospitalized for at least one night?                                                                                                                                                           | 1. Yes<br>2. No                                                                                                                                                                                                                                                                                | Hospital admission in last year                                                                                                                                                                                                                                                                                                                                                                                                          | 1. Yes<br>2. No                                                                   |
| In the last 12 months, have you visited a psychologist?                                                                                                                                                                                  | 1. Yes<br>2. No                                                                                                                                                                                                                                                                                | Visit to psychologist in last year                                                                                                                                                                                                                                                                                                                                                                                                       | 1. Yes<br>2. No                                                                   |
| 1. Do you have or have you ever had any of the following diseases or health conditions?<br>2. Have you suffered this disease/health condition in the past 12 months?<br>3. Was this disease/health condition been diagnosed by a doctor? | A card with a list of 32 conditions is shown to the person interviewed after the first question, and for those conditions reported by the participant, the second and third questions are completed consecutively for each specific condition.                                                 | <ul style="list-style-type: none"> <li>Chronic obstructive pulmonary disease</li> <li>Mental disorders (anxiety and/or depression)</li> <li>Hypertension</li> <li>Heart diseases (myocardial infarction, angina, coronary disease)</li> <li>Arthrosis,</li> <li>Stroke</li> <li>Diabetes mellitus</li> <li>Malignant tumours</li> <li>Chronic pain (neck pain and/or low back pain)</li> <li>Accident with permanent injuries</li> </ul> | Yes: Answered affirmative to the three questions.<br>No: All the rest             |
| 1. Could you tell me how tall you are, approximately, without shoes?<br>2. Could you tell me your weight, approximately, without shoes and clothes?                                                                                      | Body mass index is calculated with the formulae:<br>Weight in kg/ (Height in meters) <sup>2</sup>                                                                                                                                                                                              | Obesity                                                                                                                                                                                                                                                                                                                                                                                                                                  | Yes: If Body mass index is 30 or over.<br>No: Yes: If Body mass index is under 30 |
| During the past 12 months, how often have you had alcoholic beverages of any kind (i.e. beer, wine, spirits, distilled and mixed drinks, or other alcoholic beverages)                                                                   | 1. Daily or almost daily<br>2. 5–6 days per week<br>3. 3–4 days per week<br>4. 1–2 days per week<br>5. 2–3 days in a month<br>6. Once a month<br>7. Less than once a month<br>8. Not in the last 12 months, have I stopped drinking<br>9. Never or just a few sips to taste it throughout life | Alcohol consumption in last 12 months                                                                                                                                                                                                                                                                                                                                                                                                    | Yes. Options 1 to 6<br>No: Option 7 to 9                                          |

|                                                                                                        |    |                                                                      |                       |                                            |
|--------------------------------------------------------------------------------------------------------|----|----------------------------------------------------------------------|-----------------------|--------------------------------------------|
| Could you tell me if you smoke?                                                                        | 1. | Yes, I smoke daily                                                   | Current smoking habit | Yes. Options 1 and 2<br>No: Option 3 and 4 |
|                                                                                                        | 2. | Yes, I smoke, but not daily                                          |                       |                                            |
|                                                                                                        | 3. | I don't currently smoke but have smoked before                       |                       |                                            |
|                                                                                                        | 4. | I neither smoke nor have I ever smoked regularly ..                  |                       |                                            |
| Which of these possibilities best describes how often you do some physical activity in your free time? | 1. | I don't exercise. I occupy my free time almost completely sedentary. | Physical inactivity   | Yes. Option 1<br>No: Option 2 to 4         |
|                                                                                                        | 2. | I do some occasional physical or sports activity.                    |                       |                                            |
|                                                                                                        | 3. | I do physical activity several times a month                         |                       |                                            |
|                                                                                                        | 4. | I do sports or physical training several times a week                |                       |                                            |

- <sup>1</sup> Muñoz, P.E.; Vázquez, J.L.; Rodríguez Insausti, F.; Pastrana, E.; Varo, J. Adaptación española del General Health Questionnaire (G.H.Q.) de D. P. Goldberg (un método de identificación de casos psiquiátricos en la comunidad [Spanish adaptation of the General Health Questionnaire (G.H.Q.) of D. P. Goldberg (a method for identifying psychiatric cases in the community)]). *Arch. Neurobiol.* **1979**, *42*, 139–158. (Ref #24) <sup>2</sup> Instituto Nacional de Estadística. Encuesta Nacional de Salud. 2017. Available online: [https://www.ine.es/daco/daco42/clasificaciones/cno11\\_notas.pdf](https://www.ine.es/daco/daco42/clasificaciones/cno11_notas.pdf) [https://www.ine.es/en/metodologia/t15/t153041917\\_en.pdf](https://www.ine.es/en/metodologia/t15/t153041917_en.pdf) (accessed on 12-February-2021). (Ref #21) \*We grouped “fair” with “poor” and “very poor” instead of with “good” and “very good.” because in our country “Fair”, (in Spanish “regular”), has a negative connotation.

**Table S2.** Distribution according to the number of mental health variable among participant with diabetes mellitus and matched non-diabetes controls included in the Spanish National Health Interview Survey 2017.

| Number of Mental Health Variable | Non-diabetes Controls |              |      | Diabetes Mellitus Cases |              |      |
|----------------------------------|-----------------------|--------------|------|-------------------------|--------------|------|
|                                  | <i>n</i>              | % Over Total | % *  | <i>n</i>                | % Over Total | % *  |
| None                             | 1352                  | 63.8         | NA   | 1133                    | 53.5         | NA   |
| One                              | 369                   | 17.4         | 48.1 | 442                     | 20.9         | 44.8 |
| Two                              | 252                   | 11.9         | 32.9 | 312                     | 14.7         | 31.6 |
| Three                            | 146                   | 6.9          | 19.0 | 232                     | 10.9         | 23.5 |

\* Proportion over those with at least one mental condition. NA. Not applicable.

**Table S3.** Distribution according to the mental health variables analysed among participant with diabetes mellitus included in the Spanish National Health Interview Survey 2017.

| Mental Health Variables                              | Mental Disorders, <i>n</i> (%) | Psychological Distress GHQ-12 > 3, <i>n</i> (%) | Consumption of Psychiatric Medications, <i>n</i> (%) | Total |
|------------------------------------------------------|--------------------------------|-------------------------------------------------|------------------------------------------------------|-------|
| Mental disorders, <i>n</i> (%)                       | NA                             | 299 (56.5)                                      | 385 (72.5)                                           | 529   |
| Psychological distress GHQ-12 > 3, <i>n</i> (%)      | 299 (56.5)                     | NA                                              | 324 (51.4)                                           | 603   |
| Consumption of psychiatric medications. <i>n</i> (%) | 385 (72.5)                     | 324 (51.4)                                      | NA                                                   | 630   |
| Total                                                | 529                            | 603                                             | 630                                                  | NA    |

NA. Not applicable.

**Table S4.** Distribution according to the mental health variables analysed among participant with diabetes mellitus included in the Spanish National Health Interview Survey 2017.

| Mental Health Variables                              | Mental Disorders, <i>n</i> (%) | Psychological Distress GHQ-12 > 3, <i>n</i> (%) | Consumption of Psychiatric Medications, <i>n</i> (%) | Total |
|------------------------------------------------------|--------------------------------|-------------------------------------------------|------------------------------------------------------|-------|
| Mental disorders, <i>n</i> (%)                       | NA                             | 189 (46.2)                                      | 292 (71.2)                                           | 407   |
| Psychological distress GHQ-12 > 3, <i>n</i> (%)      | 189 (46.2)                     | NA                                              | 209 (51.6)                                           | 405   |
| Consumption of psychiatric medications. <i>n</i> (%) | 292 (71.2)                     | 209 (51.6)                                      | NA                                                   | 499   |
| Total                                                | 407                            | 405                                             | 499                                                  | NA    |

NA. Not applicable.

**Table 5.** Distribution of mental disorder, psychological distress (GHQ-12  $\geq$  3) and consumption of psychiatric medications according to socio-demographic variables among subject with DM and matched non-DM controls. Spanish National Health Interview Survey 2017.

| Socio-Demographic Variables |             | Mental disorders |          |          | Psychological distress GHQ-12 > 3 |          |          | Consumption of psychiatric medications |          |          |
|-----------------------------|-------------|------------------|----------|----------|-----------------------------------|----------|----------|----------------------------------------|----------|----------|
|                             |             | DM               | Non-DM   | <i>p</i> | DM                                | Non-DM   | <i>p</i> | DM                                     | Non-DM   | <i>p</i> |
| <b>Total</b>                |             | <i>n</i>         | <i>n</i> |          | <i>n</i>                          | <i>n</i> |          | <i>n</i>                               | <i>n</i> |          |
|                             |             | 529              | 407      | <0.001   | 603                               | 405      | <0.001   | 630                                    | 499      | <0.001   |
| Sex                         | Men         | 160              | 121      | 0.01     | 213                               | 150      | <0.001   | 189                                    | 130      | <0.001   |
|                             | Women       | 369              | 286      | <0.001   | 390                               | 255      | <0.001   | 441                                    | 369      | 0.001    |
| Age groups                  | 35–59 years | 105              | 73       | 0.007    | 128                               | 79       | <0.001   | 86                                     | 65       | 0.059    |
|                             | 60–69 years | 106              | 95       | 0.389    | 115                               | 76       | 0.002    | 131                                    | 91       | 0.003    |
|                             | 70–79 years | 172              | 135      | 0.016    | 183                               | 120      | <0.001   | 212                                    | 168      | 0.007    |
|                             | 80 or more  | 144              | 103      | 0.003    | 171                               | 127      | 0.002    | 197                                    | 174      | 0.130    |
| Living with a couple        | No          | 288              | 220      | 0.001    | 318                               | 213      | <0.001   | 343                                    | 283      | 0.008    |
|                             | Yes         | 241              | 187      | 0.002    | 285                               | 192      | <0.001   | 287                                    | 216      | <0.001   |

|                   |            |     |     |       |     |     |        |     |     |       |
|-------------------|------------|-----|-----|-------|-----|-----|--------|-----|-----|-------|
| Educational level | Primary    | 320 | 237 | 0.023 | 360 | 229 | <0.001 | 387 | 298 | 0.042 |
|                   | Secondary  | 143 | 123 | 0.044 | 163 | 118 | <0.001 | 161 | 121 | 0.001 |
|                   | University | 24  | 29  | 0.092 | 27  | 32  | 0.078  | 29  | 43  | 0.282 |
| Social class      | Upper      | 29  | 41  | 0.513 | 38  | 47  | 0.178  | 42  | 52  | 0.140 |
|                   | Middle     | 155 | 126 | 0.047 | 181 | 122 | <0.001 | 193 | 159 | 0.031 |
|                   | Low        | 314 | 219 | 0.002 | 258 | 219 | <0.001 | 364 | 263 | 0.003 |

DM: Diabetes mellitus. *p* value for comparison of prevalence between DM and matched Non-DM subjects.

**Table S6.** Variables associated with the presence of mental disorders among persons experiencing DM. Spanish National Health Interview Survey 2017.

| Health Variables                         | Categories          | Odds Ratio | 95% Confidence Interval |
|------------------------------------------|---------------------|------------|-------------------------|
| Sex                                      | Men                 | 1          |                         |
|                                          | Women               | 1.66       | 1.18–2.33               |
| Age groups                               | 35–59 years         | 1          |                         |
|                                          | 60–69 years         | 0.73       | 0.45–1.18               |
|                                          | 70–79 years         | 0.81       | 0.50–1.31               |
|                                          | 80 or more          | 0.56       | 0.32–0.98               |
| Self-rated health                        | Very good/ good     | 1          |                         |
|                                          | Fair/poor/very poor | 1.61       | 1.09–2.38               |
| Hospital admission in last year          | No                  | 1          |                         |
|                                          | Yes                 | 0.55       | 0.36–0.83               |
| Visit to psychologist in last year       | No                  | 1          |                         |
|                                          | Yes                 | 10.55      | 5.00–22.26              |
| Respiratory diseases                     | No                  | 1          |                         |
|                                          | Yes                 | 2.19       | 1.54–3.13               |
| Chronic pain                             | No                  | 1          |                         |
|                                          | Yes                 | 1.42       | 1.02–1.96               |
| Psychological distress (GHQ-12 $\geq$ 3) | No                  | 1          |                         |
|                                          | Yes                 | 3.17       | 2.32–4.35               |
| Consumption of psychiatric medications   | No                  | 1          |                         |
|                                          | Yes                 | 9.31       | 6.7–12.77               |

DM: Diabetes mellitus. *p* value for comparison of prevalence between DM and matched Non-DM subjects.

**Table S7.** Variables associated with the presence of Psychological distress (GHQ-12  $\geq$  3), among persons experiencing DM. Spanish National Health Interview Survey 2017.

| Health Variables                   | Categories          | Odds Ratio | 95% Confidence Interval |
|------------------------------------|---------------------|------------|-------------------------|
| Sex                                | Men                 | 1          |                         |
|                                    | Women               | 1.35       | 1.04–1.76               |
| Age groups                         | 35–59 years         | 1          |                         |
|                                    | 60–69 years         | 0.49       | 0.33–0.72               |
|                                    | 70–79 years         | 0.56       | 0.37–0.83               |
|                                    | 80 or more          | 0.60       | 0.38–0.96               |
| Living with a couple               | Yes                 | 1          |                         |
|                                    | No                  | 1.38       | 1.07–1.78               |
| Self-rated health                  | Very good/ good     | 1          |                         |
|                                    | Fair/poor/very poor | 2.05       | 1.48–2.82               |
| Emergency services in last year    | No                  | 1          |                         |
|                                    | Yes                 | 1.38       | 1.06–1.80               |
| Visit to psychologist in last year | No                  | 1          |                         |
|                                    | Yes                 | 2.07       | 1.17–3.64               |
| Stroke                             | No                  | 1          |                         |
|                                    | Yes                 | 2.12       | 1.35–3.33               |

|                                        |     |      |           |
|----------------------------------------|-----|------|-----------|
| Physical inactivity                    | No  | 1    |           |
|                                        | Yes | 0.56 | 0.43–0.72 |
| Consumption of psychiatric medications | No  | 1    |           |
|                                        | Yes | 1.37 | 1.01–1.85 |
| Mental disorders                       | No  | 1    |           |
|                                        | Yes | 3.11 | 2.28–4.25 |

DM: Diabetes mellitus. *p* value for comparison of prevalence between DM and matched Non-DM subjects.

**Table S8.** Variables associated with consumption of psychiatric medications among persons experiencing DM. Spanish National Health Interview Survey 2017.

| Health Variables                         | Categories          | Odds Ratio | 95% Confidence Interval |
|------------------------------------------|---------------------|------------|-------------------------|
| Sex                                      | Men                 | 1          |                         |
|                                          | Women               | 1.58       | 1.15–2.16               |
| Age groups                               | 35–59 years         | 1          |                         |
|                                          | 60–69 years         | 1.61       | 1.01–2.56               |
|                                          | 70–79 years         | 2.00       | 1.23–3.23               |
|                                          | 80 or more          | 2.68       | 1.56–4.59               |
| Self-rated health                        | Very good/ good     | 1          |                         |
|                                          | Fair/poor/very poor | 1.95       | 1.36–2.79               |
| Emergency services in last year          | No                  | 1          |                         |
|                                          | Yes                 | 1.44       | 1.07–1.94               |
| Visit to psychologist in last year       | No                  | 1          |                         |
|                                          | Yes                 | 4.12       | 2.06–8.24               |
| Arthrosis                                | No                  | 1          |                         |
|                                          | Yes                 | 1.49       | 1.08–2.04               |
| Stroke                                   | No                  | 1          |                         |
|                                          | Yes                 | 2.11       | 1.30–3.43               |
| Chronic pain                             | No                  | 1          |                         |
|                                          | Yes                 | 1.66       | 1.23–2.23               |
| Psychological distress (GHQ-12 $\geq$ 3) | No                  | 1          |                         |
|                                          | Yes                 | 1.34       | 0.99–1.83               |
| Mental disorders                         | No                  | 1          |                         |
|                                          | Yes                 | 9.26       | 6.76–12.67              |

DM: Diabetes mellitus. *p* value for comparison of prevalence between DM and matched Non-DM subjects.
